# Supplementary material for: Capturing the missing [AgF2]− anion within an Ru2(iii/iii) dimeric dumbbell complex
Source: Royal Society of Chemistry journal article supplement (doi:10.1039/c5dt04875c), 2016-01-01
Supplement: c5dt04875c1.pdf [file c5dt04875c1.pdf]

Supporting Information for:

**Capturing the Missing  $[\text{AgF}_2]^-$  Anion Within an  $\text{Ru}_2(\text{III}/\text{III})$  Dimeric Dumbbell Complex**

Amanda R. Corcos and John F. Berry\*

Department of Chemistry, University of Wisconsin–Madison, 1101 University Ave. Madison,  
WI 53706

Email: [berry@chem.wisc.edu](mailto:berry@chem.wisc.edu)

## Experimental Section.

**General Procedures.** All syntheses were conducted under a dry N<sub>2</sub> atmosphere in an MBraun glovebox; product workup and isolation were achieved under ambient conditions. CH<sub>2</sub>Cl<sub>2</sub> was dried with CaH<sub>2</sub> and distilled before use. Tetrahydrofuran (THF) and hexanes were obtained from a Vacuum Atmospheres Solvent System and degassed prior to use. All materials were commercially available and used as received, unless otherwise noted. The compound Ru<sub>2</sub>(ap)<sub>4</sub>Cl was prepared according to a literature procedure,<sup>[1]</sup> and the Hap ligand was purified by sublimation prior to use.

**Synthesis.** {[Ru<sub>2</sub>(ap)<sub>4</sub>]<sub>2</sub>[AgF<sub>2</sub>]}[BF<sub>4</sub>]<sub>3</sub> (**2**)[BF<sub>4</sub>]<sub>3</sub>. Ru<sub>2</sub>(ap)<sub>4</sub>Cl (150 mg, 0.164 mmol, 1.00 eq.) and AgBF<sub>4</sub> (82.5 mg, 0.423 mmol, 2.58 eq.) were dissolved in 12 mL of freshly distilled CH<sub>2</sub>Cl<sub>2</sub> and 4 mL THF. The solution changed color from forest green to scarlet red and formation of a gray precipitate (presumably Ag/AgCl) was observed almost instantly. The reaction mixture was allowed to stir overnight at RT under N<sub>2</sub>. The reaction mixture was then filtered through a fine frit. After concentrating the CH<sub>2</sub>Cl<sub>2</sub>/THF solution, the filtrate was layered with hexanes and allowed to crystallize by slow diffusion at RT. Yield: 146.4 mg, 82.5%. MW: 2164.18 g mol<sup>-1</sup>. MALDI-TOF (m/z): 898 [M – Ag(Ru<sub>2</sub>(ap)<sub>4</sub>F)(BF<sub>4</sub>)<sub>3</sub>]<sup>+</sup>. IR (ATR) ν/cm<sup>-1</sup>: 1598 (s), 1482 (s), 1462 (s), 1425 (s), 1340 (m), 1287 (m), 1259 (m), 1208 (s), 1164 (m), 1057 (s), 1023 (m), 963 (m), 923 (m), 868 (s), 837 (w), 764 (s), 729 (s), 699 (s), 653 (w). UV-Vis in CH<sub>2</sub>Cl<sub>2</sub> λ = 390 nm (sh), 489 nm, 925 nm. Anal. for [C<sub>88</sub>H<sub>72</sub>AgB<sub>3</sub>F<sub>14</sub>N<sub>16</sub>Ru<sub>4</sub>]•CH<sub>2</sub>Cl<sub>2</sub>: calcd. C 47.53, H 3.32, N 9.96; found C 47.73, H 3.77, N 9.51.

**Physical Measurements.** Matrix-assisted laser desorption/ionization (MALDI) time-of-flight (TOF) mass spectrometry data were obtained using an anthracene matrix on a Bruker ULTRAFLEX® III mass spectrometer equipped with a SmartBeam® laser in positive ion detection mode. UV-Vis spectra were obtained using a StellarNet Miniature BLUE-wave UV-Vis dip probe with a Tungsten-Krypton light source and a 10 mm path length tip. IR spectra were taken on a Bruker Tensor 27 spectrometer using an ATR adapter (no matrix). Cyclic voltammograms were taken on a BASi Potentiostat using Epsilon software in CH<sub>2</sub>Cl<sub>2</sub> solutions with 0.1 M NBu<sub>4</sub>BF<sub>4</sub> and 1.0 mM substrate. The electrodes were as follows: glassy carbon (working), Pt wire (auxiliary) and Ag/Ag<sup>+</sup> in CH<sub>3</sub>CN (reference). The potentials were referenced versus the ferrocene/ferrocenium redox couple, by externally added ferrocene. Elemental analysis was performed at Midwest Microlab, LLC in Indianapolis, IN, USA.

**X-ray Crystallography.** Crystallographic data were measured at the Molecular Structure Laboratory of the Chemistry Department of the University of Wisconsin–Madison. Suitable crystals of {**2**}[BF<sub>4</sub>]<sub>3</sub>•3CH<sub>2</sub>Cl<sub>2</sub> were selected under oil and ambient conditions. For {**2**}[BF<sub>4</sub>]<sub>3</sub>•3CH<sub>2</sub>Cl<sub>2</sub>, a red plate shaped crystal with dimensions 0.219 x 0.079 x 0.068 mm was selected. The crystal was attached to the tip of a MiTeGen MicroMount©, mounted in a stream of cold nitrogen at 100(1) K, and centered in the X-ray beam using a video monitoring system. The crystal evaluation and data collection were performed on a Bruker Quazar SMART APEX-II diffractometer with Mo-Kα ( $\lambda = 0.71073 \text{ \AA}$ ) radiation. The data were collected using a routine to survey the reciprocal and were indexed by the SMART program.<sup>[2]</sup> The structures were solved via direct methods and refined by iterative cycles of least-squares refinement on F<sup>2</sup> followed by difference Fourier synthesis.<sup>[3, 4]</sup> All hydrogen atoms were included in the final structure factor

calculation at idealized positions and were allowed to ride on the neighboring atoms with relative isotropic displacement coefficients. Absorption corrections were based on a fitted function to the empirical transmission surface as sampled by multiple equivalent measurements.<sup>[5]</sup> The space group  $P\bar{1}$  was chosen for refinement of the structure of  $\{2\}[\text{BF}_4]_3 \cdot 3\text{CH}_2\text{Cl}_2$  on the basis of intensity statistics indicating a centrosymmetric structure, and this choice yields a chemically reasonable and computationally stable refinement.<sup>[6]</sup>

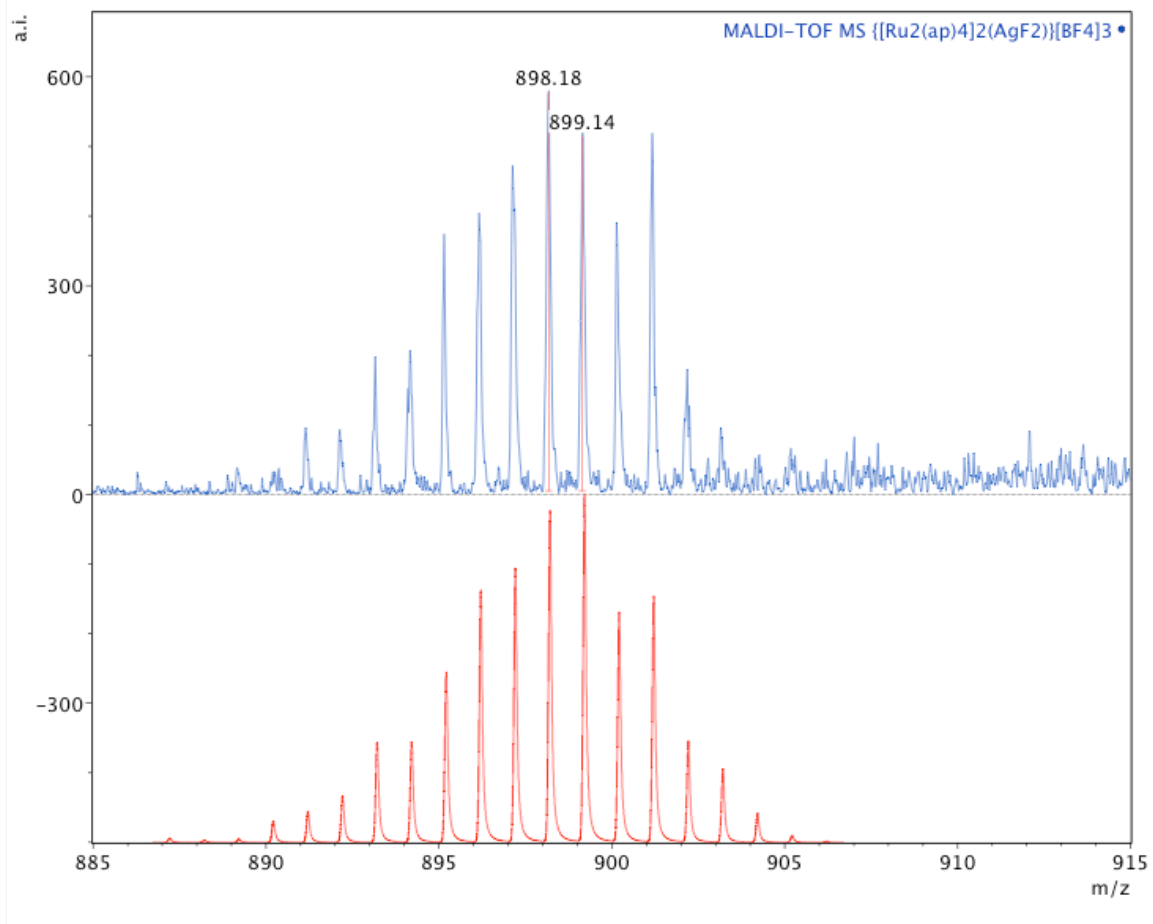

**Figure S1.** Mass spectrum for  $\{2\}[BF_4]_3$ . This data (top, simulation below) indicates the complex flies as  $[Ru_2(ap)_4F]^+$ .

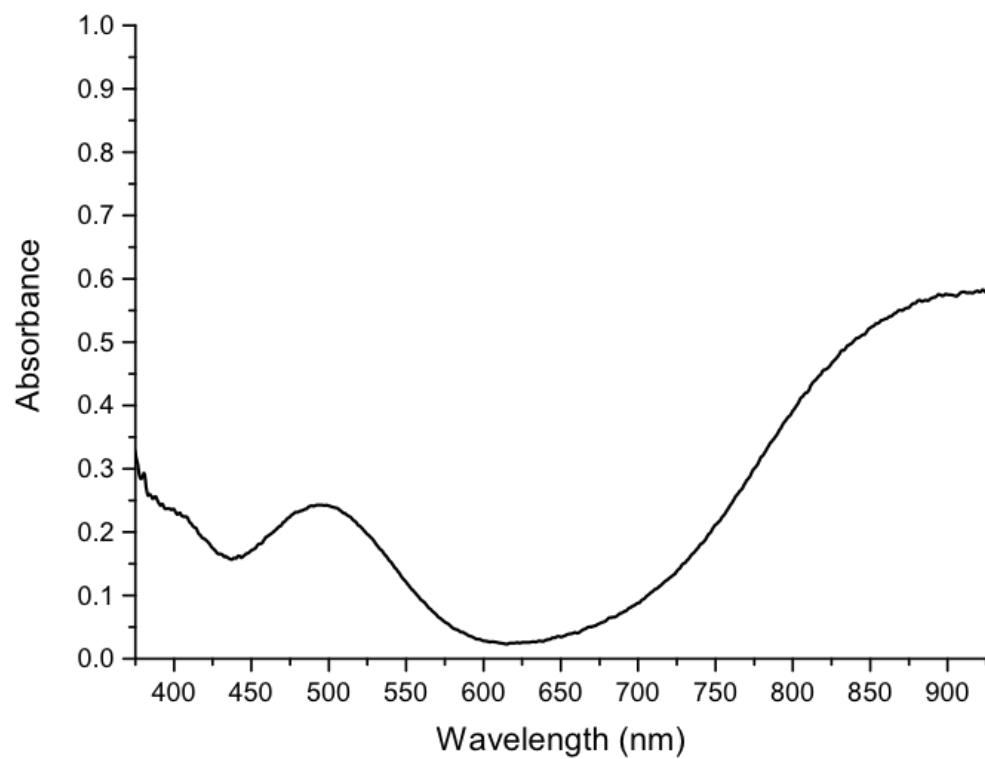

**Figure S2.** Electronic absorption spectrum for {2}[BF<sub>4</sub>]<sub>3</sub> in CH<sub>2</sub>Cl<sub>2</sub>.

**Table S1.** Summary of X-ray crystallographic data for  $\{2\}[\text{BF}_4]_3 \cdot 3\text{CH}_2\text{Cl}_2$ 

| Compound                              | $\{2\}[\text{BF}_4]_3 \cdot 3\text{CH}_2\text{Cl}_2$                                              |
|---------------------------------------|---------------------------------------------------------------------------------------------------|
| Formula                               | $\text{C}_{91}\text{H}_{78}\text{Ag}_1\text{B}_3\text{Cl}_6\text{F}_{14}\text{N}_{16}\text{Ru}_4$ |
| Formula Weight g/mol                  | 2418.97                                                                                           |
| Temperature (K)                       | 100(1)                                                                                            |
| Crystal system                        | Triclinic                                                                                         |
| Space Group                           | $P\bar{1}$                                                                                        |
| $a$ , Å                               | 9.9382(4)                                                                                         |
| $b$ , Å                               | 12.7219(5)                                                                                        |
| $c$ , Å                               | 18.5759(8)                                                                                        |
| $\alpha$ °                            | 87.507(2)                                                                                         |
| $\beta$ °                             | 88.869(2)                                                                                         |
| $\gamma$ °                            | 82.265(2)                                                                                         |
| $V$ , Å <sup>3</sup>                  | 2324.8(2)                                                                                         |
| $Z$                                   | 1                                                                                                 |
| Density (calculated)                  | 1.728 g/cm <sup>3</sup>                                                                           |
| Crystal size                          | 0.219 x 0.079 x 0.068 mm <sup>3</sup>                                                             |
| Data / restraints / parameters        | 13265 / 296 / 662                                                                                 |
| Goodness-of-fit on $F^2$              | 1.094                                                                                             |
| $R1^a$ , $wR2^b$ ( $I < 2\sigma(I)$ ) | 0.0330, 0.0786                                                                                    |
| $R1^a$ , $wR2^b$ (all data)           | 0.0411, 0.0823                                                                                    |

<sup>a</sup> $R1 = \sum ||F_o| - |F_c|| / \sum |F_o|$ . <sup>b</sup> $wR2 = [\sum [w(F_o^2 - F_c^2)^2] / \sum [w(F_o^2)^2]]^{1/2}$ ,  $w = 1/\sigma^2(F_o^2) + (aP)^2 + bP$ , where  $P = [\max(0 \text{ or } F_o^2) + 2(F_c^2)]/3$ .

**Table S2.** Crystallographic bond distances and for {2}[BF<sub>4</sub>]<sub>3</sub>•3CH<sub>2</sub>Cl<sub>2</sub>.

| Atom | Atom            | Length/Å  | Atom | Atom | Length/Å |
|------|-----------------|-----------|------|------|----------|
| Ag1  | F1              | 2.274(1)  | C19  | C20  | 1.374(5) |
| Ag1  | F1 <sup>a</sup> | 2.274(1)  | C20  | C21  | 1.379(5) |
| Ru1  | Ru2             | 2.2835(3) | C21  | C22  | 1.387(4) |
| Ru1  | F1              | 2.054(1)  | C23  | C24  | 1.376(4) |
| Ru1  | N1              | 2.068(2)  | C24  | C25  | 1.398(5) |
| Ru1  | N3              | 2.056(2)  | C25  | C26  | 1.363(5) |
| Ru1  | N5              | 2.064(2)  | C26  | C27  | 1.417(4) |
| Ru1  | N7              | 2.059(2)  | C28  | C29  | 1.379(7) |
| Ru2  | N2              | 2.020(2)  | C28  | C33  | 1.396(7) |
| Ru2  | N4              | 2.019(2)  | C28A | C33A | 1.3900   |
| Ru2  | N6              | 2.007(2)  | C28A | C29A | 1.3900   |
| Ru2  | N8              | 2.016(2)  | C33A | C32A | 1.3900   |
| N1   | C1              | 1.359(3)  | C32A | C31A | 1.3900   |
| N1   | C5              | 1.361(3)  | C31A | C30A | 1.3900   |
| N2   | C5              | 1.365(3)  | C30A | C29A | 1.3900   |
| N2   | C6              | 1.417(3)  | C29  | C30  | 1.401(7) |
| N3   | C12             | 1.353(3)  | C30  | C31  | 1.383(8) |
| N3   | C16             | 1.362(3)  | C31  | C32  | 1.372(8) |
| N4   | C16             | 1.358(3)  | C32  | C33  | 1.395(7) |
| N4   | C17             | 1.429(3)  | C34  | C35  | 1.369(3) |
| N5   | C23             | 1.356(3)  | C35  | C36  | 1.394(4) |
| N5   | C27             | 1.362(3)  | C36  | C37  | 1.370(4) |
| N6   | C27             | 1.359(3)  | C37  | C38  | 1.414(3) |
| N6   | C28             | 1.451(5)  | C39  | C40  | 1.391(4) |
| N6   | C28A            | 1.377(8)  | C39  | C44  | 1.395(3) |
| N7   | C34             | 1.354(3)  | C40  | C41  | 1.392(4) |
| N7   | C38             | 1.367(3)  | C41  | C42  | 1.384(4) |
| N8   | C38             | 1.356(3)  | C42  | C43  | 1.383(4) |
| N8   | C39             | 1.430(3)  | C43  | C44  | 1.392(4) |
| C1   | C2              | 1.371(3)  | Cl3  | C46  | 1.7601   |
| C2   | C3              | 1.397(4)  | Cl4  | C46  | 1.7605   |
| C3   | C4              | 1.370(3)  | Cl3A | C46A | 1.7598   |



|     |     |          |      |      |        |
|-----|-----|----------|------|------|--------|
| C4  | C5  | 1.417(3) | C13B | C46B | 1.8528 |
| C6  | C7  | 1.391(3) | C14A | C46A | 1.7601 |
| C6  | C11 | 1.396(3) | C14B | C46B | 1.6289 |
| C7  | C8  | 1.390(4) | F6   | B2   | 1.3832 |
| C8  | C9  | 1.380(4) | F7   | B2   | 1.3885 |
| C9  | C10 | 1.386(4) | F8   | B2   | 1.4054 |
| C10 | C11 | 1.391(4) | F9   | B2   | 1.3930 |
| C12 | C13 | 1.371(3) | F2   | B1   | 1.3926 |
| C13 | C14 | 1.395(4) | F3   | B1   | 1.3836 |
| C14 | C15 | 1.371(4) | F4   | B1   | 1.4049 |
| C15 | C16 | 1.416(3) | F5   | B1   | 1.3681 |
| C17 | C18 | 1.388(4) | C11  | C45  | 1.7657 |
| C17 | C22 | 1.393(3) | C12  | C45  | 1.7721 |
| C18 | C19 | 1.394(4) |      |      |        |

<sup>a</sup> From symmetry operation; Ag1 lies on a crystallographic inversion center.

**Table S3.** Crystallographic bond angles and for {2}[BF<sub>4</sub>]<sub>3</sub>•3CH<sub>2</sub>Cl<sub>2</sub>.

| Atom | Atom | Atom            | Angle/°   | Atom | Atom | Atom | Angle/°  |
|------|------|-----------------|-----------|------|------|------|----------|
| F1   | Ag1  | F1 <sup>a</sup> | 180.00(7) | C12  | C13  | C14  | 118.7(3) |
| F1   | Ru1  | Ru2             | 179.15(4) | C15  | C14  | C13  | 119.8(2) |
| F1   | Ru1  | N1              | 90.76(7)  | C14  | C15  | C16  | 119.7(2) |
| F1   | Ru1  | N3              | 90.14(7)  | N3   | C16  | C15  | 119.7(2) |
| F1   | Ru1  | N5              | 91.47(7)  | N4   | C16  | N3   | 116.5(2) |
| F1   | Ru1  | N7              | 90.08(7)  | N4   | C16  | C15  | 123.9(2) |
| N1   | Ru1  | Ru2             | 88.45(6)  | C18  | C17  | N4   | 121.1(2) |
| N3   | Ru1  | Ru2             | 90.13(6)  | C18  | C17  | C22  | 119.9(2) |
| N3   | Ru1  | N1              | 87.38(8)  | C22  | C17  | N4   | 119.0(2) |
| N3   | Ru1  | N5              | 90.07(8)  | C17  | C18  | C19  | 119.1(3) |
| N3   | Ru1  | N7              | 179.24(8) | C20  | C19  | C18  | 120.9(3) |
| N5   | Ru1  | Ru2             | 89.34(6)  | C19  | C20  | C21  | 119.9(3) |
| N5   | Ru1  | N1              | 176.62(8) | C20  | C21  | C22  | 120.1(3) |
| N7   | Ru1  | Ru2             | 89.66(6)  | C21  | C22  | C17  | 120.0(3) |
| N7   | Ru1  | N1              | 93.34(8)  | N5   | C23  | C24  | 122.0(3) |
| N7   | Ru1  | N5              | 89.20(8)  | C23  | C24  | C25  | 118.5(3) |
| N2   | Ru2  | Ru1             | 90.84(6)  | C26  | C25  | C24  | 120.4(3) |
| N4   | Ru2  | Ru1             | 89.45(6)  | C25  | C26  | C27  | 119.3(3) |
| N4   | Ru2  | N2              | 89.11(8)  | N5   | C27  | C26  | 119.9(2) |
| N6   | Ru2  | Ru1             | 90.14(6)  | N6   | C27  | N5   | 116.1(2) |
| N6   | Ru2  | N2              | 178.62(8) | N6   | C27  | C26  | 124.1(3) |
| N6   | Ru2  | N4              | 89.93(8)  | C29  | C28  | N6   | 119.4(5) |
| N6   | Ru2  | N8              | 90.69(8)  | C29  | C28  | C33  | 120.1(4) |
| N8   | Ru2  | Ru1             | 90.25(6)  | C33  | C28  | N6   | 120.5(4) |
| N8   | Ru2  | N2              | 90.27(8)  | N6   | C28A | C33A | 115.8(7) |
| N8   | Ru2  | N4              | 179.31(8) | N6   | C28A | C29A | 123.6(7) |
| Ru1  | F1   | Ag1             | 175.79(8) | C33A | C28A | C29A | 120.0    |
| C1   | N1   | Ru1             | 119.6(2)  | C28A | C33A | C32A | 120.0    |
| C1   | N1   | C5              | 119.6(2)  | C31A | C32A | C33A | 120.0    |
| C5   | N1   | Ru1             | 120.7(2)  | C32A | C31A | C30A | 120.0    |
| C5   | N2   | Ru2             | 120.0(2)  | C31A | C30A | C29A | 120.0    |
| C5   | N2   | C6              | 119.8(2)  | C30A | C29A | C28A | 120.0    |
| C6   | N2   | Ru2             | 120.2(2)  | C28  | C29  | C30  | 120.0(5) |
| C12  | N3   | Ru1             | 120.6(2)  | C31  | C30  | C29  | 119.6(5) |

|      |     |      |          |      |      |      |          |
|------|-----|------|----------|------|------|------|----------|
| C12  | N3  | C16  | 119.7(2) | C32  | C31  | C30  | 120.6(4) |
| C16  | N3  | Ru1  | 119.2(2) | C31  | C32  | C33  | 120.2(5) |
| C16  | N4  | Ru2  | 122.0(2) | C32  | C33  | C28  | 119.5(5) |
| C16  | N4  | C17  | 118.0(2) | N7   | C34  | C35  | 122.8(2) |
| C17  | N4  | Ru2  | 119.2(2) | C34  | C35  | C36  | 118.8(2) |
| C23  | N5  | Ru1  | 120.3(2) | C37  | C36  | C35  | 119.7(2) |
| C23  | N5  | C27  | 119.9(2) | C36  | C37  | C38  | 119.7(2) |
| C27  | N5  | Ru1  | 119.6(2) | N7   | C38  | C37  | 119.9(2) |
| C27  | N6  | Ru2  | 121.9(2) | N8   | C38  | N7   | 116.5(2) |
| C27  | N6  | C28  | 119.8(3) | N8   | C38  | C37  | 123.6(2) |
| C27  | N6  | C28A | 121.6(6) | C40  | C39  | N8   | 121.4(2) |
| C28  | N6  | Ru2  | 116.7(3) | C40  | C39  | C44  | 120.0(2) |
| C28A | N6  | Ru2  | 116.5(6) | C44  | C39  | N8   | 118.6(2) |
| C34  | N7  | Ru1  | 120.6(2) | C39  | C40  | C41  | 119.2(2) |
| C34  | N7  | C38  | 119.1(2) | C42  | C41  | C40  | 121.0(3) |
| C38  | N7  | Ru1  | 119.7(2) | C43  | C42  | C41  | 119.8(3) |
| C38  | N8  | Ru2  | 121.7(2) | C42  | C43  | C44  | 119.9(2) |
| C38  | N8  | C39  | 117.0(2) | C43  | C44  | C39  | 120.1(3) |
| C39  | N8  | Ru2  | 120.4(2) | Cl3  | C46  | Cl4  | 112.9    |
| N1   | C1  | C2   | 122.6(2) | Cl3A | C46A | Cl4A | 112.9    |
| C1   | C2  | C3   | 118.3(2) | Cl4B | C46B | Cl3B | 108.5    |
| C4   | C3  | C2   | 120.2(2) | F6   | B2   | F7   | 114.3    |
| C3   | C4  | C5   | 119.5(2) | F6   | B2   | F8   | 102.6    |
| N1   | C5  | N2   | 116.2(2) | F6   | B2   | F9   | 109.4    |
| N1   | C5  | C4   | 119.7(2) | F7   | B2   | F8   | 107.7    |
| N2   | C5  | C4   | 124.0(2) | F7   | B2   | F9   | 113.0    |
| C7   | C6  | N2   | 120.0(2) | F9   | B2   | F8   | 109.2    |
| C7   | C6  | C11  | 119.3(2) | F2   | B1   | F4   | 107.1    |
| C11  | C6  | N2   | 120.6(2) | F3   | B1   | F2   | 109.6    |
| C8   | C7  | C6   | 120.3(2) | F3   | B1   | F4   | 110.1    |
| C9   | C8  | C7   | 120.3(3) | F5   | B1   | F2   | 109.7    |
| C8   | C9  | C10  | 119.9(3) | F5   | B1   | F3   | 110.2    |
| C9   | C10 | C11  | 120.3(3) | F5   | B1   | F4   | 110.1    |
| C10  | C11 | C6   | 119.9(2) | Cl1  | C45  | Cl2  | 111.1    |
| N3   | C12 | C13  | 122.4(2) |      |      |      |          |

<sup>a</sup> From symmetry operation; Ag1 lies on a crystallographic inversion center.

**Table S4.** Number of known complexes containing the free  $[X-M-X]^-$  anion, where X is a halogen and M is a coinage metal (Cu, Ag, or Au).<sup>[7]</sup>

|    | F | Cl  | Br | I  |
|----|---|-----|----|----|
| Cu | 0 | 153 | 41 | 6  |
| Ag | 0 | 13  | 7  | 6  |
| Au | 0 | 63  | 38 | 40 |

**Table S5.** Number of known ligated  $M^{\prime}-[X-M-X]-M^{\prime}$  complexes, where X is a halogen, M is a coinage metal (Cu, Ag, or Au), and  $M^{\prime}$  is another metal.<sup>[7]</sup>

|    | F | Cl | Br | I |
|----|---|----|----|---|
| Cu | 0 | 13 | 6  | 0 |
| Ag | 0 | 2  | 0  | 2 |
| Au | 0 | 0  | 0  | 0 |

## References.

- [1] A. R. Chakravarty, F. A. Cotton and D. A. Tocher, *Inorg. Chem.* **1985**, *24*, 172.
- [2] SMART, Bruker-AXS, Madison, WI, **2009**.
- [3] G. M. Sheldrick, *Acta Cryst.* **2008**, *A64*, 112.
- [4] O. V. Dolomanov, L. J. Bourhis, R. J. Gildea, J. A. K. Howard, H. Psuchmann, *J. Appl. Cryst.* **2009**, *42*, 339.
- [5] SADABS, Bruker-AXS, Madison, WI, **2012**.
- [6] G. M. Sheldrick, *CELL\_NOW*, University of Gottingen, Germany, **2008**.
- [7] Based on a search of the Cambridge Structural Database.
